# Supplementary material for: Phase II metabolic pathways of spectinamide antitubercular agents: a comparative study of the reactivity of 4-substituted pyridines to glutathione conjugation
Source: Royal Society of Chemistry journal article supplement (doi:10.1039/c5md00349k), 2015-09-07
Supplement: c5md00349k1.pdf [file c5md00349k1.pdf]

## Supplementary information for

### **Phase II Metabolic Pathways of Spectinamide Antitubercular Agents: A Comparative study of the reactivity of 4-Chloro substituted pyridines to glutathione conjugation**

Dora Babu Madhura<sup>a</sup>, Jiuyu Liu<sup>b</sup>, Bernd Meibohm<sup>a</sup> and Richard E. Lee<sup>b\*</sup>

<sup>a</sup> Department of Pharmaceutical Sciences, University of Tennessee Health Science Center,  
Memphis, TN 38105, USA;

<sup>b</sup> Department of Chemical Biology and Therapeutics, St. Jude Children's Research Hospital,  
Memphis, TN 38105, USA.

### **List of Supplementary information**

1. Figure S1. Percent parent compound remaining after Glucuronide conjugation reaction.
2. Figure S2. Percent parent compound remaining after Sulfoconjugation reaction.
3. Table S1. Glucuronide Conjugation of Spectinamide compounds in rat and human liver S9 fraction (n=3)
4. Table S2. Sulfoconjugation of Spectinamide compounds in rat and human liver S9 fraction (n=3)

**Fig S1: Percent parent compound remaining after Glucuronide conjugation reaction in rat liver S9 fraction (n=3). \*indicates statistically significant differences from the initial concentration**

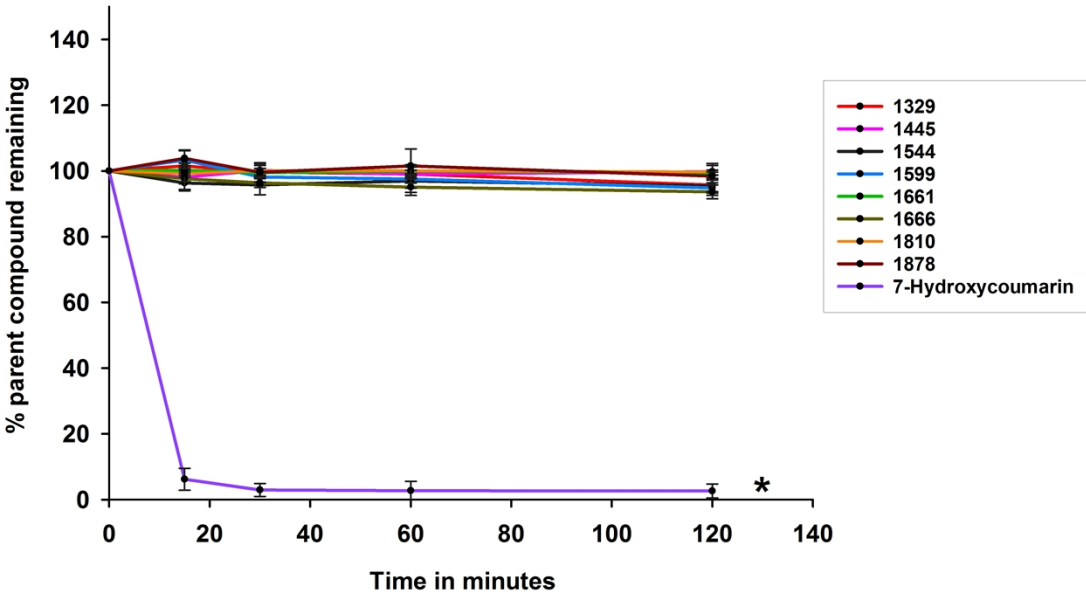

**Fig S2: Percent parent compound remaining after Sulfoconjugation reaction in rat liver S9 fraction (n=3). \*indicates statistically significant differences from the initial concentration**

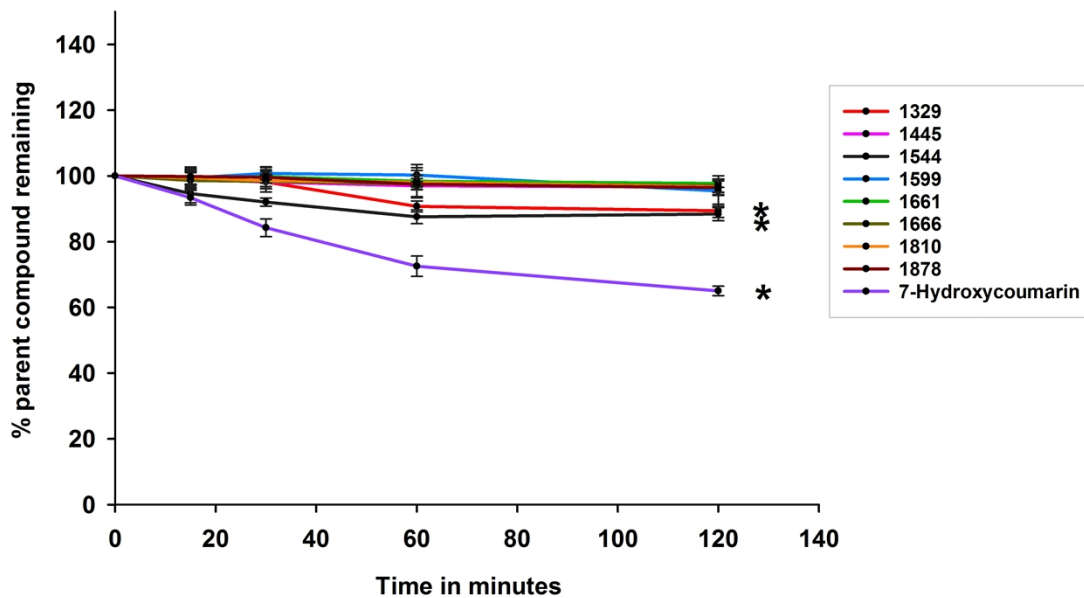

**Table S1:** Glucuronide Conjugation of Spectinamide compounds in rat and human liver S9 fraction (mean (%CV) of 3 replicates).

| Compound | Glucuronide Conjugation      |                              |
|----------|------------------------------|------------------------------|
|          | Rat                          | Human                        |
|          | % parent remaining after 2 h | % parent remaining after 2 h |
| 1329     | 95.7 (3.1)                   | 93.9 (2.9)                   |
| 1445     | 99.8 (2.5)                   | 96.7 (5.5)                   |
| 1544     | 95.5 (1.8)                   | 97.8 (2.1)                   |
| 1599     | 94.8 (1.6)                   | 99.4 (0.54)                  |
| 1661     | 99.5 (0.8)                   | 97.0 (8.8)                   |
| 1666     | 93.7 (2.1)                   | 93.5 (0.55)                  |
| 1810     | 99.7 (2.0)                   | 96.7 (4.3)                   |
| 1878     | 98.5 (1.2)                   | 98.6 (2.8)                   |
| 7-HC     | 2.6 (2.1)                    | 5.6 (11.3)                   |

**Table S2:** Sulfoconjugation of Spectinamide compounds in rat and human liver S9 fraction (mean (%CV) of 3 replicates).

| Compound | Sulfoconjugation             |                              |
|----------|------------------------------|------------------------------|
|          | Rat                          | Human                        |
|          | % parent remaining after 2 h | % parent remaining after 2 h |
| 1329     | 89.4 (2.0)                   | 96.8 (1.5)                   |
| 1445     | 96.6 (2.5)                   | 98.7 (2.7)                   |
| 1544     | 88.4 (1.9)                   | 98.0 (2.8)                   |
| 1599     | 95.5 (4.6)                   | 99.8 (1.2)                   |
| 1661     | 97.7 (1.2)                   | 97.5 (1.8)                   |
| 1666     | 97.1 (2.0)                   | 90.8 (3.1)                   |
| 1810     | 96.7 (1.8)                   | 99.4 (0.6)                   |
| 1878     | 96.5 (2.1)                   | 96.8 (1.4)                   |
| 7-HC     | 65.0 (1.4)                   | 70.8 (5.7)                   |
